# Supplementary material
Source: PubMed Central journal article supplement (PMC2529034)
Supplement: 0803640105_0803640105SI.pdf [file 0803640105_0803640105SI.pdf]

# Supporting Information

Manabe *et al.* 10.1073/pnas.0803640105

## SI Materials and Methods

**Animals.** ICR mice and Wister and Lewis rats were purchased from Nippon-Clea and Sankyo Labo Service, respectively. All animal experiments and procedures used in the present study were approved by the Animal Care and Use Committees of Aichi Medical University and Osaka University.

**Materials.** Mouse laminin-111 and porcine type I collagen were obtained from Iwaki Glass. Types II (chicken), V (bovine), and VI (bovine) collagens were purchased from Chemicon International. Rat type III collagen was obtained from Biogenesis. Mouse type IV collagen and human laminin-211/221 were purchased from BD Biosciences. Gelatin was obtained from Sigma. Fibronectin was purified from bovine serum. Laminin-511/521 was purified as described in ref. 1 or was purchased from Sigma. Anti-GFP mouse mAb was obtained from Santa Cruz Biotechnology. Anti-myc and anti-hexahistidine (his6) mAbs were purchased from Invitrogen. Horseradish peroxidase-conjugated sheep anti-mouse antibodies were obtained from GE Healthcare. Anti-heparan sulfate stub (F69-3G10) and anti-chondroitin sulfate stub (1B5, 2B6, and 3B3) mAbs and GAG-cleaving enzymes (heparitinase, heparinase, and chondroitinase ABC) were purchased from Seikagaku. Hyaluronidase was obtained from Sigma.

**Cell Culture.** 293T, MG63 (Health Science Research Resources Bank, Osaka, Japan), C2C12 (Dainippon Sumitomo Pharma), and MEF cells were maintained in DMEM supplemented with 10% FBS, penicillin, and streptomycin at 37°C under 5% CO<sub>2</sub>. COS cells were maintained in DMEM supplemented with 10% FBS, penicillin, streptomycin, and nonessential amino acids. 293F cells (Invitrogen) were maintained in serum- and protein-free FreeStyle 293 expression medium (Invitrogen) in 125-ml Erlenmeyer flasks at 37°C under 8% CO<sub>2</sub> with rotation at 120 rpm. When 293T or COS cells were transfected, the complete medium was replaced with OptiMEM (Invitrogen) after the transfection and the cells were cultured for the indicated periods of time.

**Construction of Mammalian Expression Plasmids.** Individual candidate cDNAs encoding complete ORFs, including a Kozak sequence but not a stop codon, were amplified by PCR with KOD-Plus DNA polymerase (Toyobo) by using forward and reverse primers tagged with restriction enzyme recognition sequences. For cDNAs that did not have a typical Kozak sequence upstream of the ATG initiation codon, we introduced mutations to create a consensus Kozak sequence. The PCR products were incubated with restriction enzymes, purified on MultiScreen-PCR96 plates (Millipore), and directionally introduced into the multicloning site of an EGFP-expression vector pEGFP-N3 (BD Biosciences) or a modified version of pCikanaEGFP that included tandem triple repeats of a myc tag at the C terminus. The resulting plasmids were transformed into OneShot competent cells (Invitrogen) and purified by using Montage Plasmid Miniprep96 kits (Millipore). For some clones, the PCR-amplified cDNAs were introduced into the multicloning site of the pSecTag2A mammalian expression vector (Invitrogen) to produce full-length proteins tagged with myc and his6 epitopes at their C termini. A plasmid coding for a secreted form of EGFP (sGFP) was constructed by inserting cDNA encoding a protein C inhibitor signal sequence adjacent to the initiation codon of EGFP.

**Screening for Protein Secretion.** 293T cells were plated in 96-well tissue culture plates, transfected with the GFP-fusion plasmids by using FuGENE6 (Roche) or Lipofectamine 2000 (Invitrogen), and cultured in serum-free OptiMEM medium. 293F cells cultured in 96-deep-well plates in FreeStyle 293 expression medium were transfected with the plasmids by using 293fectin (Invitrogen). At 3–4 days posttransfection, the conditioned media were collected, centrifuged, and passed through 0.2- $\mu$ m filters to remove any cell debris. The samples were then analyzed by Western blot analysis with anti-GFP mAb. Proteins were detected by using an enhanced chemiluminescence detection kit (GE Healthcare).

**Detection of Neopeptides Generated by Cleavage of GAG Chains.** To confirm GAG attachment to the core protein, C-terminally his6-tagged full-length proteins were expressed in 293F or COS cells and precipitated with Ni-resin (Qiagen). The precipitated proteins were then treated with the GAG-cleaving enzymes and subjected to Western blot analysis with anti-stub mAbs (3G10 for heparan sulfate; 1B5, 2B6, and 3B3 for chondroitin sulfate; Seikagaku) that recognize neopeptides produced after treatment with GAG-degrading enzymes. Proteins were detected by using an enhanced chemiluminescence detection kit (GE Healthcare).

**Antibody Production.** Polyclonal antibodies against the candidate proteins were raised in rabbits by immunization with recombinant proteins or synthetic peptides. We usually produced more than two nonoverlapping antigenic fragments for each candidate protein to obtain at least two independent antibodies both working in immunohistochemistry for validation of the specificities of the immunostaining. The antigenic fragments used in this study are listed in Table S6. Synthetic peptides were conjugated to keyhole limpet hemocyanin via a cysteine residue added to the N-terminal end of each peptide. For the purification of the recombinant proteins, cDNA fragments encoding antigenic fragments were PCR amplified and introduced into the multicloning site of pGEX-4T1 (GE Healthcare), pET42a (Novagen Merck), or pIVEX-GST (Roche) for expression in bacteria or pSecTag2A, pFLAG-CMV-5a (Sigma), or pCIneo-myc-his for expression in 293F cells (Table S6). To construct pCIneo-myc-his, a cDNA fragment encoding a myc-his6 epitope tag was PCR amplified by using pSecTag2A as a template and introduced between the XbaI and NotI sites of pCIneo (Promega). The GST-fusion proteins expressed in BL21 or JM109 bacteria (Invitrogen) were affinity purified by using glutathione-conjugated columns (GE Healthcare) according to the manufacturer's instructions. When pET42a was used as an expression vector, the GST-his6-fusion proteins were purified on glutathione-Sepharose columns, followed by Ni-resin chromatography. Recombinant proteins expressed and secreted by 293F cells were affinity purified by using Ni-resin (for his6-tagged proteins) or anti-FLAG (Sigma) affinity chromatography. The antisera were produced by Medical & Biological Laboratories. The resulting antibodies were purified by affinity chromatography by using the corresponding immunogenic recombinant proteins or synthetic peptides. The antibodies raised after immunization with GST-fusion proteins were passed through GST-Sepharose columns to remove any antibodies directed against GST. The antibodies raised after immunization with synthetic peptides conjugated to keyhole limpet hemocyanin were affinity purified with antigenic peptides coupled to thioester-activated Sepharose (GE Healthcare).

mAbs against the subunits of mouse laminin were produced as described in ref. 1. In brief, 50–100  $\mu\text{g}$  of antigen emulsified with Freund's complete adjuvant was injected into the hind footpads of 6- to 9-month-old female rats (WKY/NCrj or LEW/SsN Slc). Lymph node cells were subsequently fused with Sp2/0-Ag14 mouse myeloma cells. In some cases, a booster injection of antigen was given 3 days before cell fusion. After screening with ELISAs for the antigens, positive clones were further screened

by immunohistochemical staining of mouse tissues. mAbs against type IV and XVIII collagen subunits were produced as described (2).

The specificities of the antibodies were confirmed by using ELISA and Western blot analysis with immunogenic recombinant fragments and full-length recombinant proteins expressed in mammalian cells as GFP-fusion proteins.

1. Kikkawa Y, Sanzen N, Sekiguchi K (1998) Isolation and characterization of laminin-10/11 secreted by human lung carcinoma cells: laminin-10/11 mediates cell adhesion through integrin  $\alpha 3\beta 1$ . *J Biol Chem* 273:15854–15859.
2. Sado Y, et al. (1995) Establishment by the rat lymph node method of epitope-defined monoclonal antibodies recognizing the six different  $\alpha$  chains of human type IV collagen. *Histochem Cell Biol* 104:267–275.

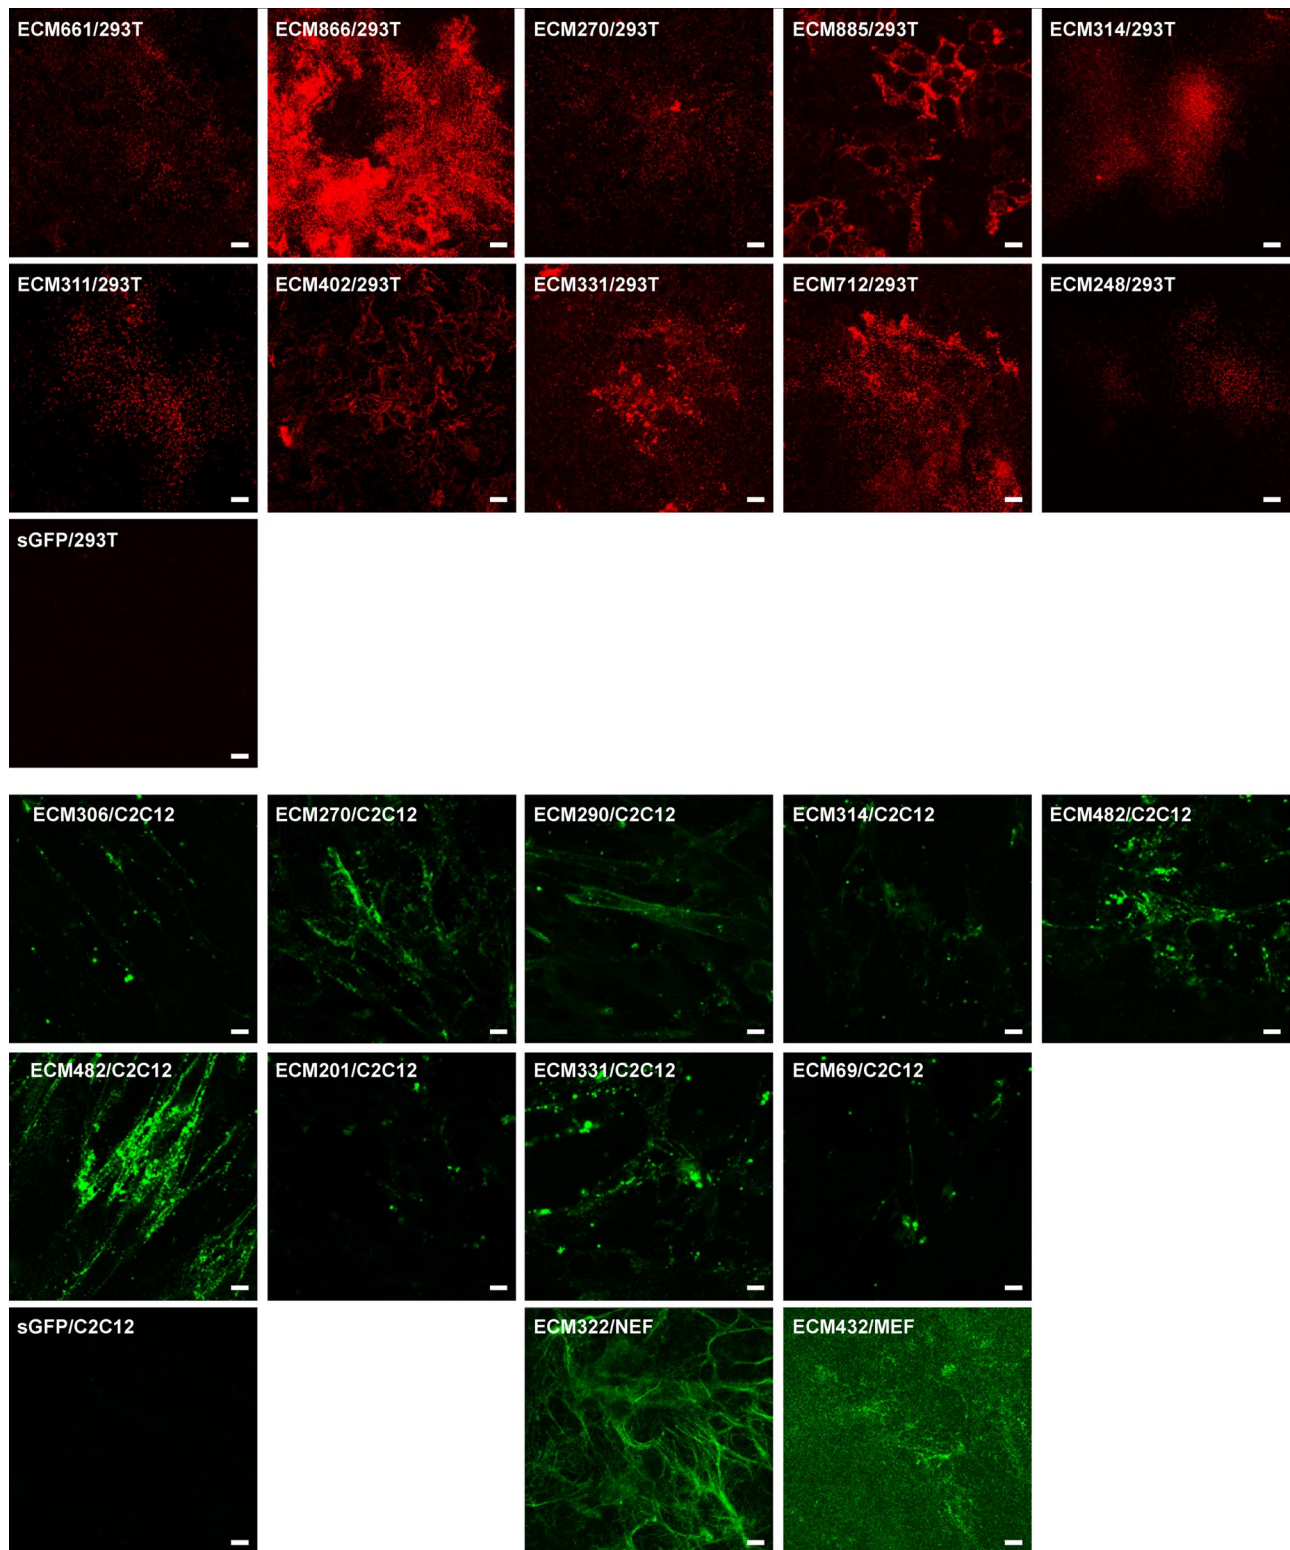

**Fig. S1.** Candidate proteins with matrix assembly activities. Protein immobilizations into the ECM of 293T cells were detected by immunocytochemical staining with an anti-GFP mAb followed by visualization with a rhodamine-conjugated secondary antibody. Deposition into the ECM of C2C12 or MEF cultures was visually screened by observation of GFP fluorescence. A signal peptide-tagged GFP (sGFP) was used as a negative control. (Scale bars, 10  $\mu$ m.)

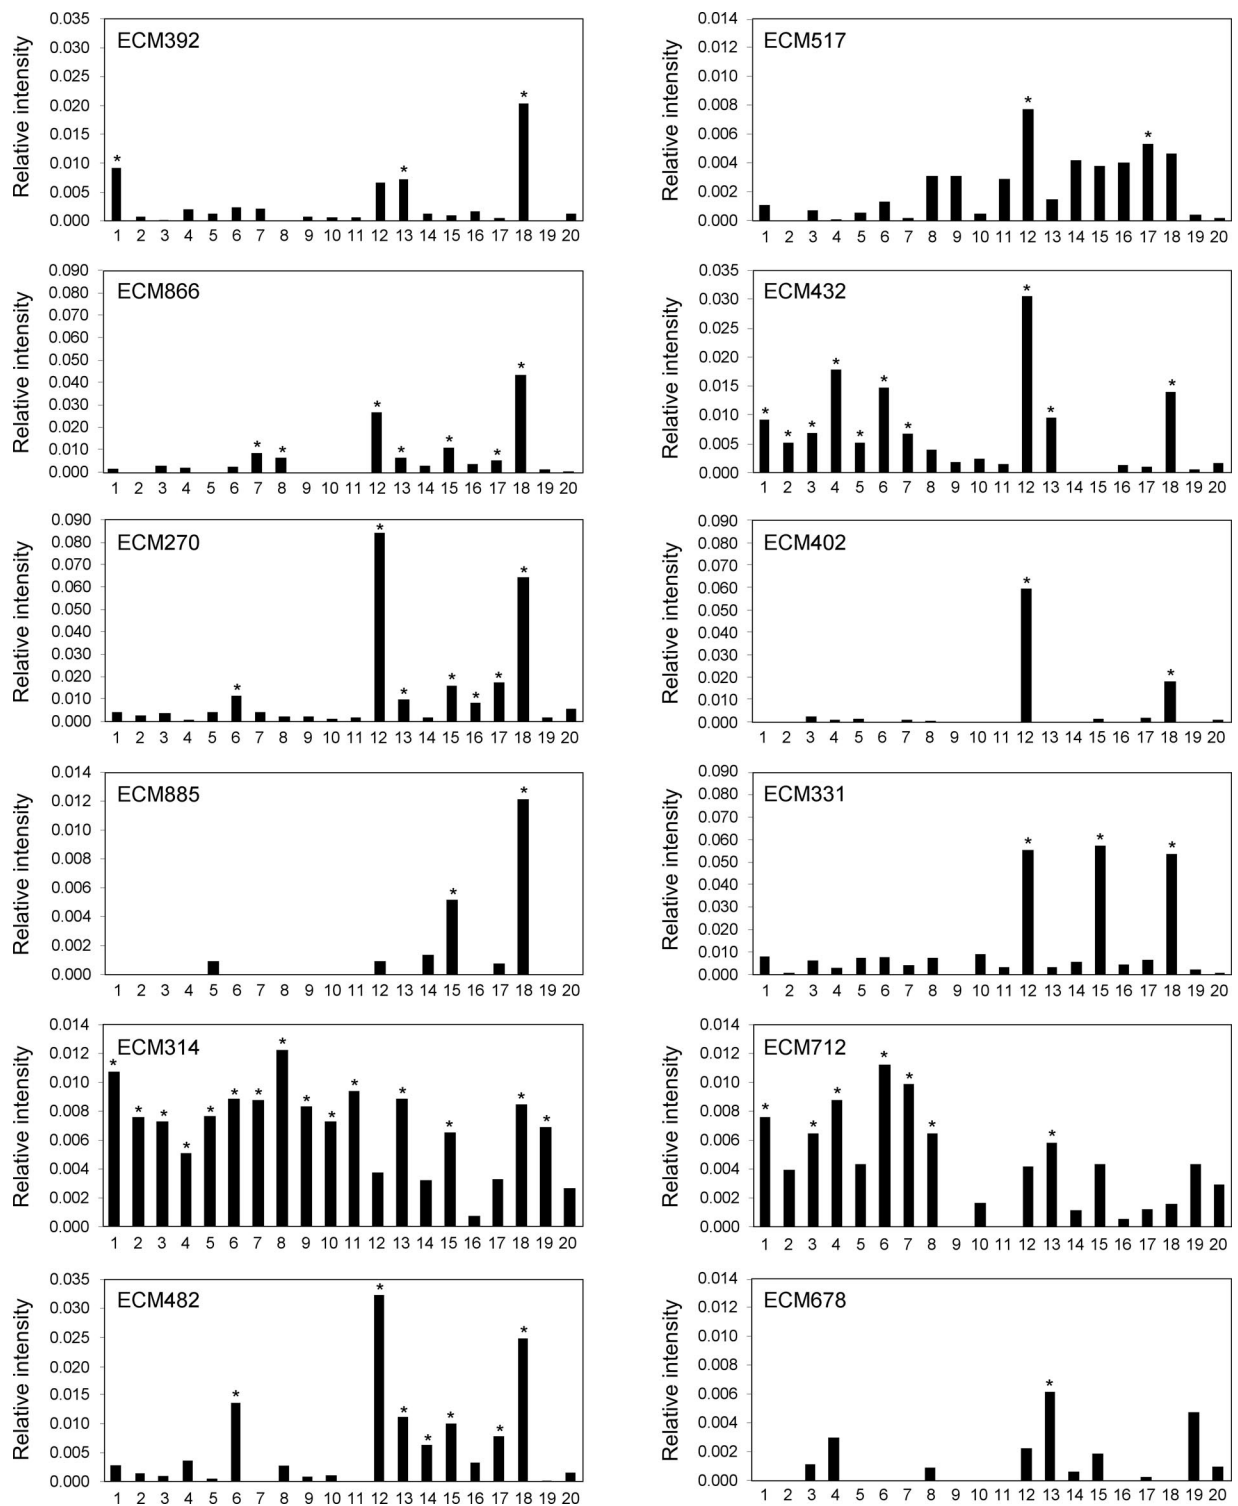

**Fig. S2.** Candidate proteins capable of binding to known ECM molecules. The ECM molecules used in the solid-phase binding assays were: 1, collagen type I; 2, collagen type II; 3, collagen type III; 4, collagen type IV; 5, collagen type V; 6, collagen type VI; 7, gelatin; 8, fibronectin; 9, laminin-111; 10, laminin-211/221; 11, laminin-511/521; 12, heparin; 13, heparan sulfate; 14, chondroitin sulfate A; 15, dermatan sulfate; 16, chondroitin sulfate C; 17, chondroitin sulfate D; 18, chondroitin sulfate E; 19, hyaluronic acid. BSA (20) was used as a negative control. The amounts of bound GFP-fusion proteins were determined by measuring the GFP intensities. The intensity of bound sGFP was subtracted from the individual readouts as the background signal. Data with the intensity over the threshold value are marked with asterisks.



**A**

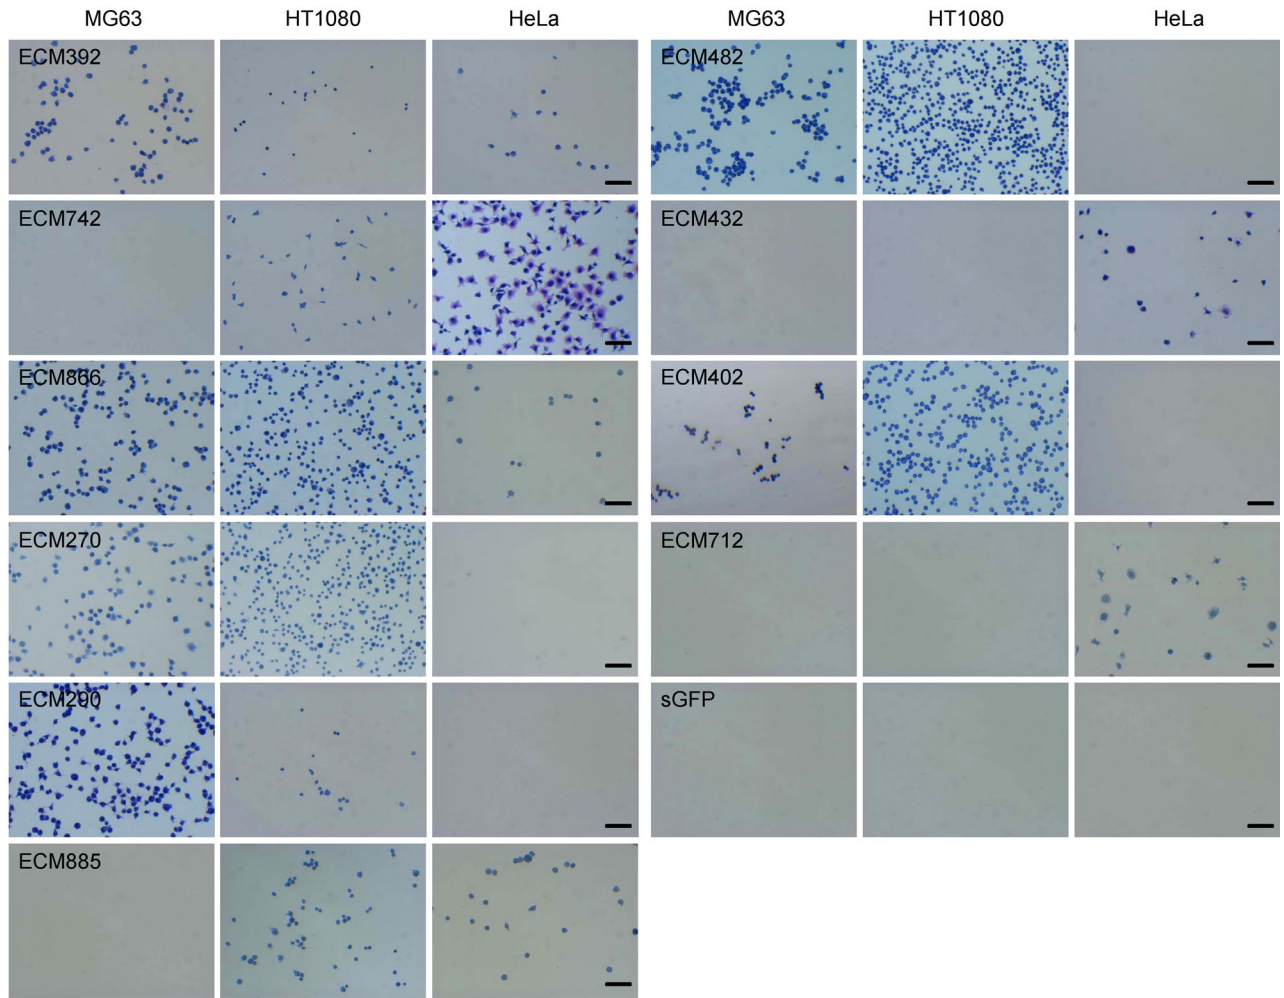

**B**

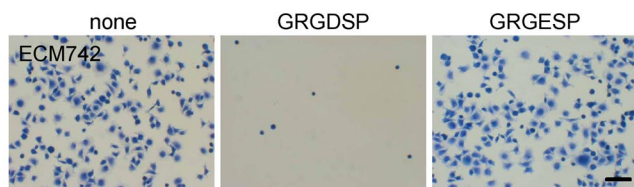

**Fig. S4.** Candidate proteins with cell adhesion-promoting activities. (A) The cell adhesion-promoting abilities were screened by incubating MG63, HT1080, and HeLa cells in 96-well plates containing immobilized GFP-tagged candidate proteins. Cells adhering to the substrates were visualized by staining with Diff-Quick (Wako). (B) HeLa cells were plated on ECM742/cradin-coated substrates in the absence (none) or presence of 1 mM peptide containing either an RGD (GRGDSP) or RGE (GRGESP) sequence. The RGD-containing peptide, but not the RGE-containing peptide, inhibits ECM742/cradin-promoted cell adhesion. (Scale bars, 100  $\mu$ m.)







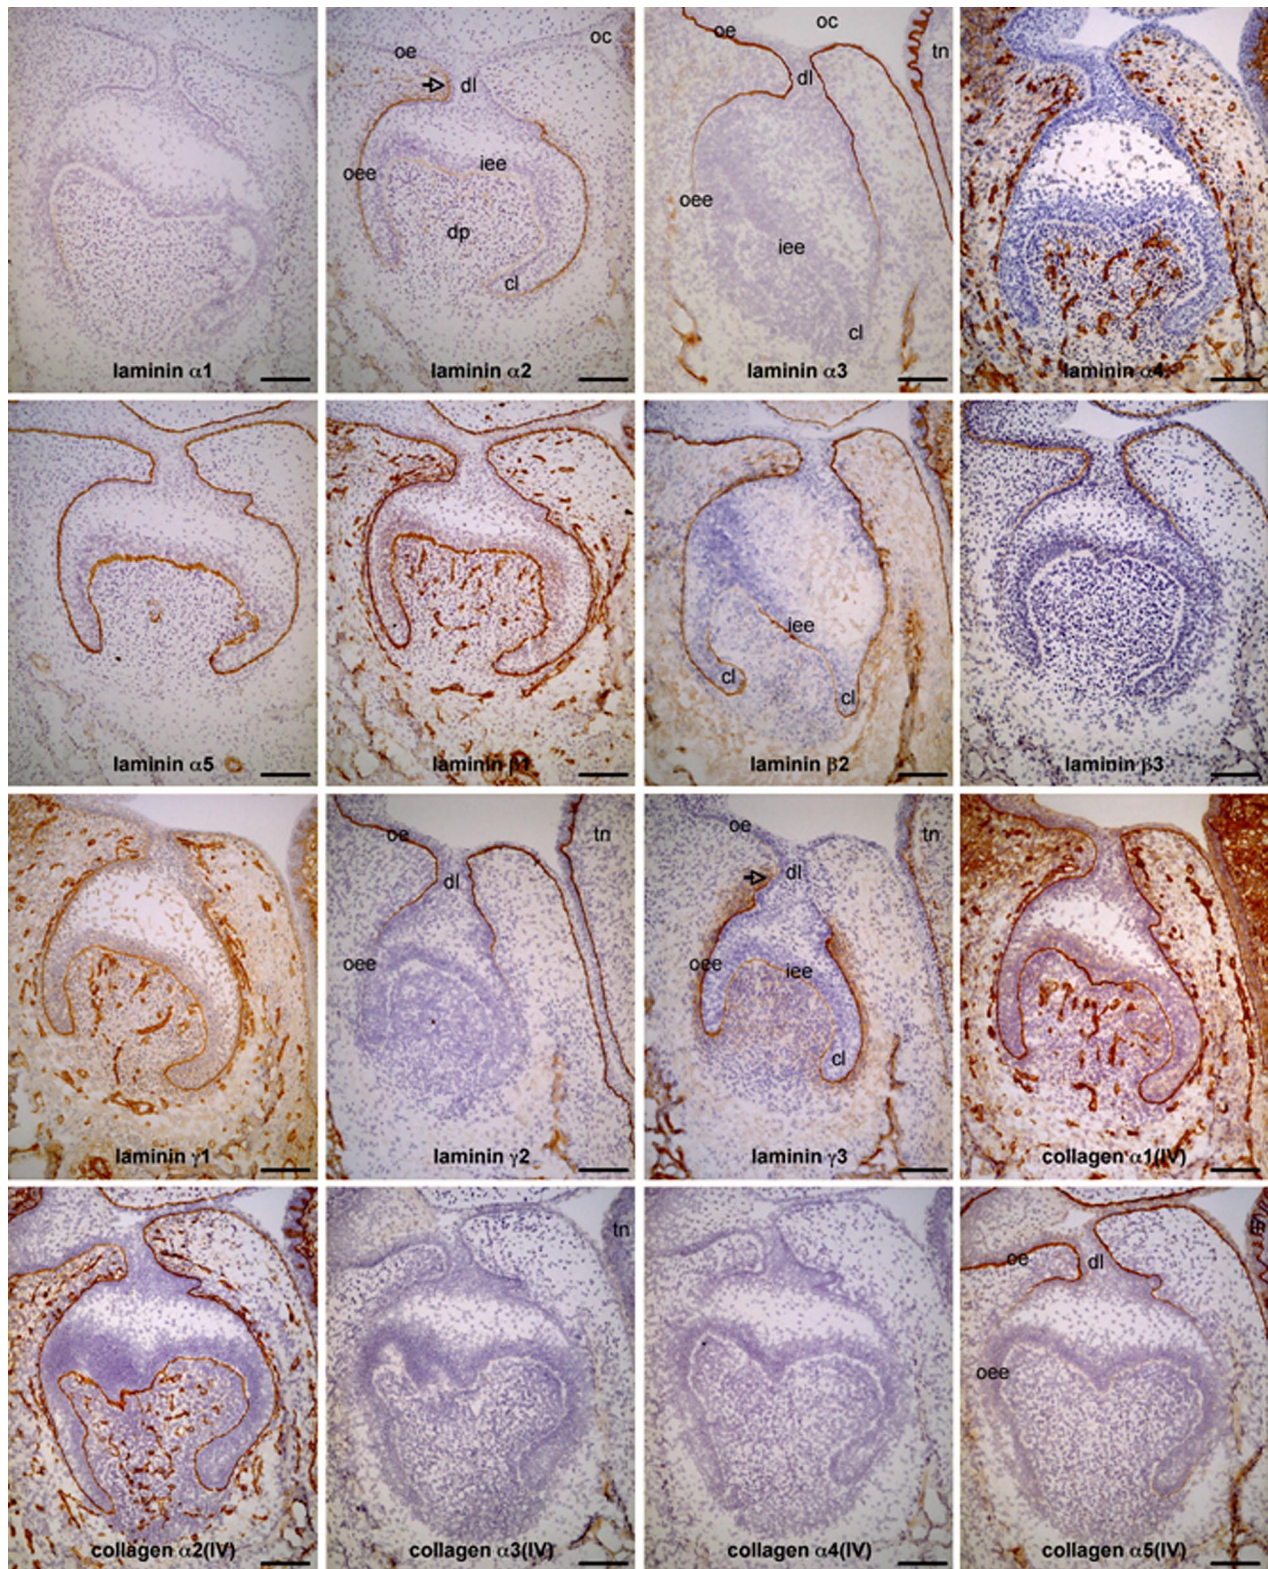

**Fig. 57.** Localizations of BM proteins in the E16.5 mouse first mandibular molar. Frontal sections of E16.5 mouse heads were stained with 38 antibodies against BM proteins. The arrows indicate asymmetries in the staining intensities found in individual epithelial BMs. oe, oral epithelium; oee, outer enamel epithelium; iee, inner enamel epithelium; dl, dental lamina; cl, cervical loop; tn, tongue; oc, oral cavity; df, dental follicle; dp, dental papilla. (Scale bars, 100  $\mu$ m.)

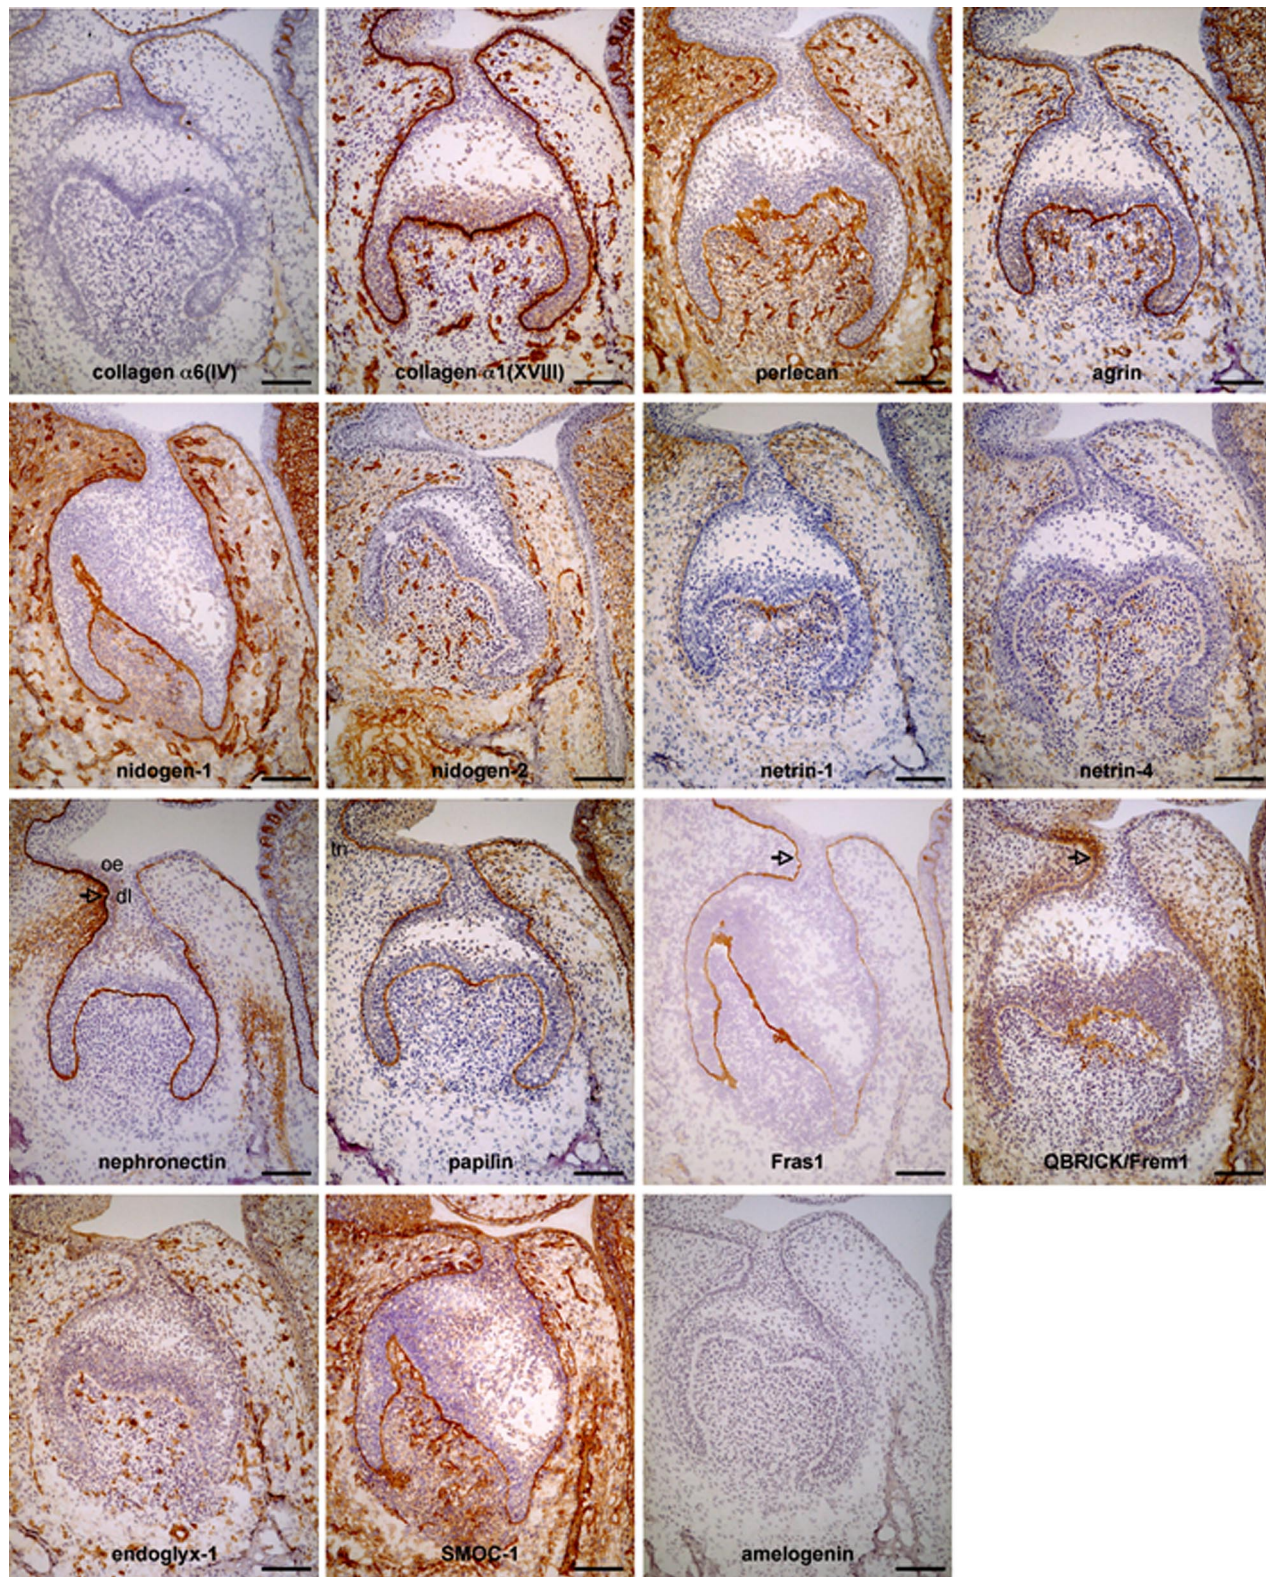

Fig. S7. (Continued).

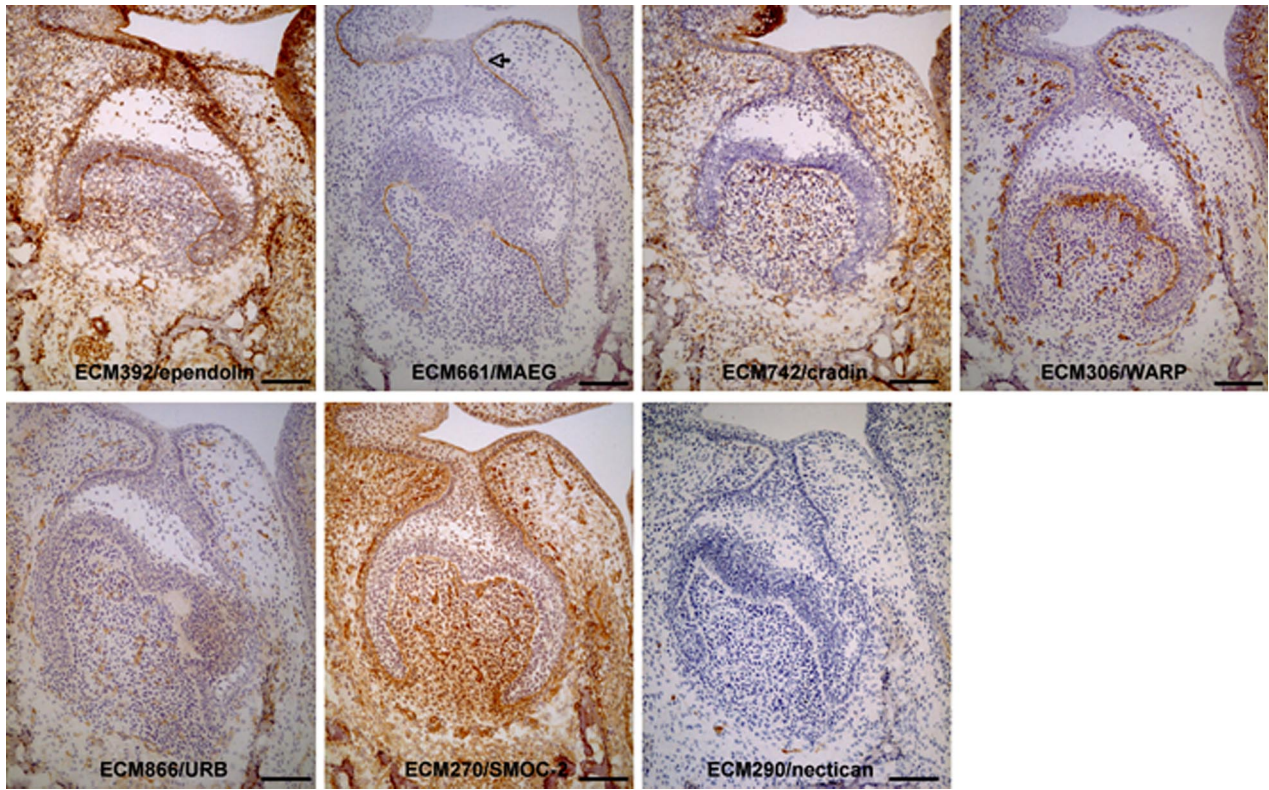

**Table S1. Designation of proteins**

| Clone name | Protein name*                | Designation of protein                                                                                                                                                             |
|------------|------------------------------|------------------------------------------------------------------------------------------------------------------------------------------------------------------------------------|
| ECM392     | <u>ependolin</u>             | Protein localizing in basement membrane zones of the epidermis and vascular endothelium.                                                                                           |
| ECM661     | MAEG                         | According to the published literature (1).                                                                                                                                         |
| ECM742     | <u>cradin</u>                | CR (chordin-like cysteine-rich) domain-containing adhesive protein.                                                                                                                |
| ECM306     | WARP                         | According to the published literature (2).                                                                                                                                         |
| ECM866     | URB                          | According to the published literature (3).                                                                                                                                         |
| ECM270     | SMOC-2                       | According to the published literature (4).                                                                                                                                         |
| ECM290     | <u>nectican</u>              | Proteoglycan with RGD-dependent cell adhesion-promoting activity.                                                                                                                  |
| ECM898     | <u>mamcan</u>                | MAM domain-containing proteoglycan.                                                                                                                                                |
| ECM885     | vitrin                       | Derived from an identical mouse EST clone (GenBank accession no. AF454755).                                                                                                        |
| ECM314     | <u>emprin</u>                | Extracellular matrix protein with prion homology.                                                                                                                                  |
| ECM482     | <u>eratin</u>                | Extracellular matrix protein isolated in our ERATO project.                                                                                                                        |
| ECM322     | <u>ADAMTSL-4</u>             | Protein structurally similar to ADAMTSL proteins.                                                                                                                                  |
| ECM517     | <u>RAINB2</u>                | Protein structurally similar to human RAINB1 (5).                                                                                                                                  |
| ECM432     | <u>tenonectin</u>            | Protein expressed in tendinous structures that shows RGD-dependent cell adhesion-promoting activity. Likely to be a mouse ortholog of human ECM2 (6).                              |
| ECM311     | IGFBP-rP10/BONO1             | According to the published literature (7, 8).                                                                                                                                      |
| ECM201     | <u>periolin</u> <sup>†</sup> | Periosteum-specific leucine-rich repeat-containing protein.                                                                                                                        |
| ECM402     | <u>epidermacan</u>           | Epidermis-specific proteoglycan.                                                                                                                                                   |
| ECM343     | <u>photomedin-1</u>          | Olfactomedin domain-containing protein expressed in the retinal photoreceptor layer (9).                                                                                           |
| ECM501     | <u>photomedin-2</u>          | Olfactomedin domain-containing protein expressed in the retinal photoreceptor layer (9).                                                                                           |
| ECM331     | <u>coffeecrisp</u>           | Protein structurally similar to the human EST clone CocoaCrisp (GenBank accession no. AF329197). Seems to be a mouse ortholog of rat LGL1 (10).                                    |
| ECM712     | <u>keratonectin</u>          | Secreted protein specifically expressed in suprabasal keratinocytes that shows cell adhesion-promoting activity. Likely to be an isoform of SK89 (11) and dermokine- $\beta$ (12). |
| ECM678     | MCP-11                       | According to the published literature (13).                                                                                                                                        |
| ECM69      | gfod2                        | According to an EST clone named glucose-fructose oxidoreductase domain containing 2 (GenBank accession no. NP_081745).                                                             |
| ECM248     | serac1                       | According to the published literature (14).                                                                                                                                        |

\*Proteins that were given new names in this study are underlined.

<sup>†</sup>This protein is identical to the recently identified protein nephrocan (15).

- Buchner G, *et al* (2000) Identification of a new EGF-repeat-containing gene from human Xp22: a candidate for developmental disorders. *Genomics* 65:16–23.
- Fitzgerald J, Tay Ting S, Bateman J-F (2002) WARP is a new member of the von Willebrand factor A-domain superfamily of extracellular matrix proteins. *FEBS Lett* 517:61–66.
- Aoki K, *et al.* (2002) Cloning, expression, and mapping of a gene that is upregulated in adipose tissue of mice deficient in bombesin receptor subtype-3. *Biochem Biophys Res Commun* 290:1282–1288.
- Vannahme C, *et al.* (2003) Characterization of SMOC-2, a modular extracellular calcium-binding protein. *Biochem J* 373:805–814.
- Merrill R-A, Plum L-A, Kaiser M-E, Clagett-Dame M (2002) A mammalian homolog of unc-53 is regulated by all-trans retinoic acid in neuroblastoma cells and embryos. *Proc Natl Acad Sci USA* 99:3422–3427.
- Nishiu J, Tanaka T, Nakamura Y (1998) Identification of a novel gene (ECM2) encoding a putative extracellular matrix protein expressed predominantly in adipose and female-specific tissues and its chromosomal localization to 9q22.3. *Genomics* 52:378–381.
- Shibata Y, *et al.* (2004) Role of a new member of IGFBP superfamily, IGFBP-rP10, in proliferation and differentiation of osteoblastic cells. *Biochem Biophys Res Commun* 325:1194–1200.
- James M-J, Jarvinen E, Thesleff I (2004) Bono1: A gene associated with regions of deposition of bone and dentine. *Gene Expression Patterns* 4:595–599.
- Furutani Y, *et al.* (2005) Identification and characterization of photomedins: novel olfactomedin-domain-containing proteins with chondroitin sulphate-E-binding activity. *Biochem J* 389:675–684.
- Kaplan F, *et al.* (1999) A novel developmentally regulated gene in lung mesenchyme: homology to a tumor-derived trypsin inhibitor. *Am J Physiol* 276:L1027–L1036.
- Moffatt P *et al* (2004) Identification of a conserved cluster of skin-specific genes encoding secreted proteins. *Gene* 334:123–131.
- Matsui T *et al* (2004) Identification of novel keratinocyte-secreted peptides dermokine- $\alpha$ - $\beta$  and a new stratified epithelium-secreted protein gene complex on human chromosome 19q13.1. *Genomics* 84:384–397.
- Wong G-W, *et al.* (2004) Mouse chromosome 17A3.3 contains 13 genes that encode functional tryptic-like serine proteases with distinct tissue and cell expression patterns. *J Biol Chem* 279:2438–2452.
- Schimenti J-C, Reynolds J-L, Planchart A (2005) Mutations in Serac1 or Synj2 cause proximal t haplotype-mediated male mouse sterility but not transmission ratio distortion. *Proc Natl Acad Sci USA* 102:3342–3347.
- Mochida Y, *et al.* (2006) Nephrocan, a novel member of the small leucine-rich repeat protein family, is an inhibitor of transforming growth factor- $\beta$  signaling. *J Biol Chem* 281:36044–36051.

**Table S2. *In vitro* functional assays for known ECM proteins**

| Protein name                   | PSORTII |       | Matrix assembly | ECM molecule binding | GAG attachment | Cell adhesiveness |
|--------------------------------|---------|-------|-----------------|----------------------|----------------|-------------------|
|                                | PSG     | GvH   |                 |                      |                |                   |
| 1 vitronectin                  | 7.06    | 0.70  | Yellow          | Yellow               | Grey           | Yellow            |
| 2 thrombospondin-1             | 5.80    | -2.19 | Grey            | Yellow               | Grey           | Yellow            |
| 3 elastin                      | -4.40   | 3.23  | Yellow          | Yellow               | Grey           | Grey              |
| 4 DEL1                         | 5.38    | 2.57  | Grey            | Grey                 | Grey           | Yellow            |
| 5 SPARC                        | 7.53    | 5.57  | Grey            | Yellow               | Grey           | Grey              |
| 6 SMOC-1                       | 3.49    | 3.57  | Yellow          | Yellow               | Grey           | Yellow            |
| 7 nephronectin                 | 5.54    | -1.62 | Yellow          | Grey                 | Grey           | Yellow            |
| 8 emilin                       | 5.18    | -1.10 | Yellow          | Grey                 | Grey           | Yellow            |
| 9 EMU-2                        | 4.54    | 4.05  | Grey            | Grey                 | Grey           | Yellow            |
| 10 collagen ( $\alpha$ 1) VIII | 7.32    | -2.90 | Yellow          | Grey                 | Grey           | Yellow            |
| 11 matrilin-1                  | 7.30    | 3.56  | Yellow          | Grey                 | Grey           | Grey              |
| 12 osteoprotegerin             | 5.75    | -3.46 | Yellow          | Yellow               | Grey           | Yellow            |
| 13 testican-2                  | 5.85    | 1.95  | Yellow          | Yellow               | Yellow         | Yellow            |
| 14 testican-3                  | 4.50    | 1.93  | Grey            | Grey                 | Yellow         | Grey              |
| 15 biglycan                    | 5.99    | 7.48  | Grey            | Yellow               | Yellow         | Grey              |
| 16 decorin                     | 6.95    | 2.08  | Grey            | Yellow               | Yellow         | Grey              |
| 17 DMP-1                       | 7.26    | 3.79  | Yellow          | Yellow               | Grey           | Yellow            |
| 18 nidogen-1                   | -4.40   | 1.70  | Yellow          | Yellow               | Grey           | Yellow            |
| 19 fibulin-1                   | 4.08    | 2.21  | Yellow          | Grey                 | Grey           | Grey              |
| 20 fibulin-2                   | -4.40   | 0.15  | Grey            | Yellow               | Grey           | Yellow            |
| 21 fibulin-3                   | 6.41    | -0.59 | Grey            | Grey                 | Grey           | Grey              |
| 22 fibulin-5                   | 5.43    | 0.92  | Yellow          | Grey                 | Grey           | Yellow            |
| 23 bone sialoprotein           | 5.85    | 0.68  | Yellow          | Yellow               | Grey           | Yellow            |
| 24 $\beta$ ig-H3               | 5.21    | 1.70  | Yellow          | Yellow               | Grey           | Yellow            |
| 25 cyr-61                      | 5.01    | -2.17 | Yellow          | Yellow               | Grey           | Yellow            |
| 26 NOV                         | 6.90    | 0.83  | Grey            | Grey                 | Grey           | Grey              |

To examine the feasibility of the strategy for *in vitro* functional screenings, 26 known ECM proteins were subjected to individual functional assays for their ECM assembly, binding to other ECM molecules, GAG attachment, and cell-adhesive activities. Items in yellow and grey indicate positive and negative results obtained in each experiment. The PSG and GvH scores derived from PSORTII searches are also shown.

Table S3. Clones selected by *in silico* screening but eliminated after *in vitro* functional assays

| DDBJ accession no. | Amino acids | PSORTII |       | Pfam domain                                                                                                                                         |
|--------------------|-------------|---------|-------|-----------------------------------------------------------------------------------------------------------------------------------------------------|
|                    |             | PSG     | GvH   |                                                                                                                                                     |
| AK037507           | 527         | 7.36    | -4.72 | Protein of unknown function(DUF563)                                                                                                                 |
| AK046675           | 437         | 4.28    | 0.14  | PF00530; SRCR                                                                                                                                       |
| AK015620           | 399         | 5.90    | 0.87  | None                                                                                                                                                |
| AK046350           | 841         | 4.49    | 1.96  | EGF-like domain; EF hand; Kazal-type serine protease inhibitor domain; Immunoglobulin domain x2                                                     |
| AK014340           | 613         | 6.10    | 2.97  | DOMON domain; Copper typeII ascorbate-dependent monooxygenase N-terminal domain; Copper type II ascorbate-dependent monooxygenase C-terminal domain |
| AK028377           | 408         | -13.40  | 0.74  | EGF-like domain; collagen triple helix repeat x20                                                                                                   |
| AK028866           | 563         | -4.40   | 0.91  | None                                                                                                                                                |
| AK014680           | 452         | 6.62    | 3.80  | Serine carboxypeptidase                                                                                                                             |
| AK016685           | 438         | 6.95    | 3.92  | 20G-Fe(II) oxygenase superfamily                                                                                                                    |
| AK017087           | 434         | 6.90    | -3.59 | Serine carboxypeptidase                                                                                                                             |
| AK030604           | 685         | 4.69    | 0.07  | Acyltransferase family                                                                                                                              |
| AK031608           | 392         | 6.73    | 7.13  | None                                                                                                                                                |
| AK018432           | 459         | 5.22    | -1.38 | EGF-like domain                                                                                                                                     |
| AK033488           | 363         | -5.55   | -1.38 | None                                                                                                                                                |
| AK033642           | 1038        | 3.24    | -0.81 | None                                                                                                                                                |
| AK035674           | 470         | 5.11    | -0.79 | None                                                                                                                                                |
| AK050223           | 546         | 7.26    | -2.76 | None                                                                                                                                                |
| AK054356           | 1182        | 6.59    | -6.44 | von Wille brand factor type A domain x6                                                                                                             |
| AK005465           | 439         | 7.78    | 9.51  | Sushi domain x2; EGF-like domain x2                                                                                                                 |
| AK013028           | 343         | 4.60    | -0.22 | Carbohydrate kinase                                                                                                                                 |
| AK014608           | 426         | 5.75    | -7.11 | None                                                                                                                                                |
| AK028580           | 464         | -7.03   | -1.60 | None                                                                                                                                                |
| AK029377           | 555         | 5.54    | -3.16 | None                                                                                                                                                |
| AK033983           | 596         | -4.40   | 1.08  | None                                                                                                                                                |
| AK034323           | 623         | 4.60    | 0.33  | SAM domain (sterile alpha motif)                                                                                                                    |
| AK034617           | 410         | 5.44    | -6.31 | None                                                                                                                                                |
| AK035259           | 504         | 4.71    | -1.34 | Galactosyltransferase                                                                                                                               |
| AK039202           | 359         | 1.51    | 2.94  | None                                                                                                                                                |
| AK043957           | 417         | 4.51    | -3.89 | None                                                                                                                                                |
| AK044739           | 462         | 5.34    | -7.93 | None                                                                                                                                                |
| AK046065           | 677         | 6.53    | 1.21  | None                                                                                                                                                |
| AK047738           | 493         | 4.50    | -4.77 | None                                                                                                                                                |
| AK028081           | 358         | 5.57    | 2.81  | None                                                                                                                                                |
| AK036568           | 593         | 4.07    | -1.03 | None                                                                                                                                                |
| AK012720           | 601         | 5.89    | 2.49  | None                                                                                                                                                |
| AK031254           | 359         | -4.40   | 0.85  | EGF-like domain x2; CUB domain, SUSHI domain                                                                                                        |
| AK013520           | 329         | 5.01    | -0.05 | EF-hand                                                                                                                                             |
| AK046301           | 837         | 8.25    | 1.11  | Leucine-rich repeat                                                                                                                                 |
| AK044704           | 389         | 6.27    | -2.50 | EGF-like domain x2; laminin G                                                                                                                       |
| AK030132           | 570         | -4.40   | -1.78 | None                                                                                                                                                |
| AK045363           | 408         | 5.54    | -0.08 | None                                                                                                                                                |
| AK029104           | 541         | -4.40   | -1.22 | Protein of unknown function (DUF1171)                                                                                                               |
| AK077120           | 483         | -0.13   | 1.16  | None                                                                                                                                                |
| AK078812           | 483         | -0.81   | 2.04  | None                                                                                                                                                |
| AK084987           | 597         | -1.92   | 0.72  | None                                                                                                                                                |
| AK142898           | 454         | 4.24    | 0.23  | EGF-like domain x3; NTR/C345C module                                                                                                                |
| AK076022           | 308         | -2.45   | 1.35  | Domain of unknown function (DUF323)                                                                                                                 |
| AK086819           | 496         | 3.29    | 2.47  | Olfactomedin-like domain                                                                                                                            |
| AK076682           | 329         | -4.62   | -0.18 | None                                                                                                                                                |
| AK087856           | 448         | 2.49    | 1.80  | None                                                                                                                                                |
| AK079886           | 392         | 7.13    | 1.09  | None                                                                                                                                                |
| AK086298           | 311         | 4.80    | 1.31  | EGF-like domain; SUSHI domain                                                                                                                       |
| AK076222           | 643         | 1.07    | 2.23  | Glycosyltransferase family 25                                                                                                                       |
| AK076281           | 409         | 0.98    | 1.45  | None                                                                                                                                                |
| AK145082           | 489         | 2.94    | 2.00  | None                                                                                                                                                |
| AK132143           | 318         | 7.28    | 1.68  | EF-hand                                                                                                                                             |
| AK139382           | 410         | -6.31   | 0.92  | None                                                                                                                                                |
| AK133986           | 347         | -2.30   | 2.56  | NHL repeat                                                                                                                                          |
| AK157301           | 1045        | -0.10   | 0.84  | Cysteine-rich repeat; NF-X1 type Zinc-finger                                                                                                        |
| AK160156           | 396         | 1.25    | 1.93  | Glycosyl hydrolases family 18                                                                                                                       |



Table S4. BM proteins known to date

|    | Protein name*                               |
|----|---------------------------------------------|
| 1  | <u>laminin <math>\alpha</math>1</u>         |
| 2  | <u>laminin <math>\alpha</math>2</u>         |
| 3  | <u>laminin <math>\alpha</math>3</u>         |
| 4  | <u>laminin <math>\alpha</math>4</u>         |
| 5  | <u>laminin <math>\alpha</math>5</u>         |
| 6  | <u>laminin <math>\beta</math>1</u>          |
| 7  | <u>laminin <math>\beta</math>2</u>          |
| 8  | <u>laminin <math>\beta</math>3</u>          |
| 9  | <u>laminin <math>\gamma</math>1</u>         |
| 10 | <u>laminin <math>\gamma</math>2</u>         |
| 11 | <u>laminin <math>\gamma</math>3</u>         |
| 12 | <u>collagen <math>\alpha</math>1(IV)</u>    |
| 13 | <u>collagen <math>\alpha</math>2(IV)</u>    |
| 14 | <u>collagen <math>\alpha</math>3(IV)</u>    |
| 15 | <u>collagen <math>\alpha</math>4(IV)</u>    |
| 16 | <u>collagen <math>\alpha</math>5(IV)</u>    |
| 17 | <u>collagen <math>\alpha</math>6(IV)</u>    |
| 18 | collagen $\alpha$ 1(VII)                    |
| 19 | collagen $\alpha$ 1(XV)                     |
| 20 | <u>collagen <math>\alpha</math>1(XVIII)</u> |
| 21 | <u>perlecan</u>                             |
| 22 | agrin                                       |
| 23 | <u>nidogen-1</u>                            |
| 24 | <u>nidogen-2</u>                            |
| 25 | <u>netrin-1</u>                             |
| 26 | <u>netrin-4</u>                             |
| 27 | nephronectin                                |
| 28 | papilin                                     |
| 29 | Fras1                                       |
| 30 | <u>QBRICK/Frem1</u>                         |
| 31 | Frem2                                       |
| 32 | Frem3                                       |
| 33 | <u>endoglyx-1</u>                           |
| 34 | <u>SMOC-1</u>                               |
| 35 | <u>amelogenin</u>                           |
| 36 | <u>ECM392/ependolin</u>                     |
| 37 | <u>ECM661/MAEG</u>                          |
| 38 | <u>ECM742/cradin</u>                        |
| 39 | <u>ECM306/WARP</u>                          |
| 40 | <u>ECM866/URB</u>                           |
| 41 | <u>ECM270/SMOC-2</u>                        |
| 42 | <u>ECM290/nectican</u>                      |
| 43 | usherin                                     |
| 44 | TIN-ag                                      |
| 45 | AMACO                                       |
| 46 | amelotin                                    |

BM proteins are defined by their predominant localizations in BM zones on immunohistochemistry. Some interstitial ECM proteins, e.g., fibronectin, fibrillins, collagens, and fibulins, have also been shown to localize at BM zones, but are not classified as BM proteins here because of their predominant localizations in connective tissue matrices adjacent to the BM zones. \*BM proteins whose tissue localizations were determined by immunohistochemistry in the present study are underlined.



Table S5. Summary of BM protein composition in developing oral and tooth germ epithelia

| BM protein                  | Epithelial BMs                     |               |                         |                         |    |    |
|-----------------------------|------------------------------------|---------------|-------------------------|-------------------------|----|----|
|                             | Oral cavity adjacent to tooth germ | Tooth germ    |                         |                         |    |    |
|                             |                                    | Dental lamina | Outer enamel epithelium | Inner enamel epithelium |    |    |
| Apical zone                 | Middle zone                        |               |                         | Basal zone              |    |    |
| laminin $\alpha$ 5          |                                    |               |                         |                         |    |    |
| laminin $\beta$ 1           |                                    |               |                         |                         |    |    |
| collagen $\alpha$ 1(IV)     |                                    |               |                         |                         |    |    |
| collagen $\alpha$ 2(IV)     |                                    |               |                         |                         |    |    |
| collagen $\alpha$ 1(XVIII)  |                                    |               |                         |                         |    |    |
| nidogen1                    |                                    |               |                         |                         |    |    |
| papilin                     |                                    |               |                         |                         |    |    |
| perlecan                    |                                    |               |                         |                         |    |    |
| agrin                       |                                    |               |                         |                         |    |    |
| SMOC-1                      |                                    |               |                         |                         |    |    |
| ECM270/SMOC-2               |                                    |               |                         |                         |    |    |
| nephronectin                | *                                  | *             |                         |                         |    |    |
| netrin-4                    |                                    |               |                         |                         |    |    |
| laminin $\gamma$ 1          |                                    |               |                         |                         |    |    |
| nidogen2                    |                                    |               |                         |                         |    |    |
| Fras1                       | *                                  | *             | *                       |                         |    |    |
| QBRICK                      | *                                  | *             | *                       |                         |    |    |
| ECM306/WARP                 |                                    |               |                         |                         |    |    |
| netrin-1                    |                                    |               |                         |                         |    |    |
| laminin $\beta$ 2           |                                    |               |                         |                         |    |    |
| ECM661/MAEG                 | **                                 | **            |                         |                         |    |    |
| ECM392/ependolin            |                                    |               |                         |                         |    |    |
| ECM742/cradin               |                                    |               |                         |                         |    |    |
| laminin $\alpha$ 2          |                                    | *             |                         |                         |    |    |
| laminin $\gamma$ 3          |                                    | *             |                         |                         |    |    |
| collagen $\alpha$ 5(IV)     |                                    |               |                         |                         |    |    |
| collagen $\alpha$ 6(IV)     |                                    |               |                         |                         |    |    |
| laminin $\alpha$ 3          |                                    |               |                         |                         |    |    |
| laminin $\beta$ 3           |                                    |               |                         |                         |    |    |
| laminin $\gamma$ 2          |                                    |               |                         |                         |    |    |
| laminin $\alpha$ 1          |                                    |               |                         |                         |    |    |
| laminin $\alpha$ 4          |                                    |               |                         |                         |    |    |
| collagen $\alpha$ 3(IV)     |                                    |               |                         |                         |    |    |
| collagen $\alpha$ 4(IV)     |                                    |               |                         |                         |    |    |
| endoglyx-1                  |                                    |               |                         |                         |    |    |
| amelogenin                  |                                    |               |                         |                         |    |    |
| ECM866/URB                  |                                    |               |                         |                         |    |    |
| ECM290/nectican             |                                    |               |                         |                         |    |    |
| Number of proteins detected | 28                                 | 30            | 24                      | 27                      | 25 | 25 |

The expression levels of 38 BM proteins, including 7 newly identified proteins, in different regions of the E16.5 mouse first mandibular molar and oral mucosa are graded into three categories, namely strong (orange), moderate/slight (yellow), and undetectable (grey), based on their immunostaining intensities. The inner enamel epithelium is divided into three zones designated the apical (including the cervical loop), middle, and basal (including cusp and intercusp) zones. The numbers of BM proteins detected in the individual zones are indicated at the bottom.

\*Stronger staining on the buccal side than on the lingual side.  
 \*\*Stronger staining on the lingual side than on the buccal side.

**Table S6. Antibodies used in the immunohistochemical analyses**

| Basement membrane protein  | Antibody |            |                              | Antigen*    |                   |             |                   | GenBank or RIKEN FANTOM Accession no. | Pretreatments**                 |
|----------------------------|----------|------------|------------------------------|-------------|-------------------|-------------|-------------------|---------------------------------------|---------------------------------|
|                            | Type     | Clone name | Cat no./Vendor               | Antigen 1   |                   | Antigen 2   |                   |                                       |                                 |
|                            |          |            |                              | Polypeptide | Expression vector | Polypeptide | Expression vector |                                       |                                 |
| laminin $\alpha$ 1         | mAb      | 5B7-H1     |                              | C749-P1156  | pSecTag2A         |             |                   | J04064                                | formaldehyde, acid, and enzymes |
| laminin $\alpha$ 2         | mAb      | 4H8-2      | L0663/SIGMA Aldrich          |             |                   |             |                   |                                       | formaldehyde, acid, and enzymes |
| laminin $\alpha$ 3         | mAb      | M35-N3-B9  |                              | L231-Q639   | pSecTag2A         |             |                   | X84013                                | acetone, acid, and enzymes      |
| laminin $\alpha$ 4         | mAb      | M49-N7-F3  |                              | R1032-I1228 | pSecTag2A         |             |                   | NM 010681                             | formaldehyde, acid, and enzymes |
| laminin $\alpha$ 5         | mAb      | M5N8-C8    |                              | G1643-E2167 | pSecTag2A         |             |                   | NM 001081171                          | formaldehyde, acid, and enzymes |
| laminin $\beta$ 1          | mAb      | 1B5-D12    |                              | C821-P1226  | pSecTag2A         |             |                   | M15525                                | formaldehyde, acid, and enzymes |
| laminin $\beta$ 2          | mAb      | B24-N8-D6  |                              | R523-A831   | pSecTag2A         |             |                   | NM 008483                             | acetone, acid, and enzymes      |
| laminin $\beta$ 3          | mAb      | B31-N8-G8  |                              | Q18-C575    | pSecTag2A         |             |                   | U43298                                | formaldehyde, acid, and enzymes |
| laminin $\gamma$ 1         | mAb      | A5         | MAB1914/Chemicon             |             |                   |             |                   |                                       | formaldehyde and acid           |
| laminin $\gamma$ 2         | mAb      | C21-N1-C9  |                              | H197-C602   | pSecTag2A         |             |                   | U43327                                | acetone, acid, and enzymes      |
| laminin $\gamma$ 3         | mAb      | C38-N4-F4  |                              | C767-S927   | pSecTag2A         |             |                   | NM 011836                             | acetone, acid, and enzymes      |
| collagen $\alpha$ 1(IV)    | mAb      | H11        |                              | (1)         |                   |             |                   |                                       | acetone and acid                |
| collagen $\alpha$ 2(IV)    | mAb      | H22        |                              | (1)         |                   |             |                   |                                       | acetone and acid                |
| collagen $\alpha$ 3(IV)    | mAb      | H31        |                              | (1)         |                   |             |                   |                                       | acetone and acid                |
| collagen $\alpha$ 4(IV)    | mAb      | RH43       |                              | (2)         |                   |             |                   |                                       | acetone and acid                |
| collagen $\alpha$ 5(IV)    | mAb      | H53        |                              | (2)         |                   |             |                   |                                       | acetone and acid                |
| collagen $\alpha$ 6(IV)    | mAb      | B66        |                              | (2)         |                   |             |                   |                                       | acetone                         |
| collagen $\alpha$ 1(XVIII) | mAb      | CM186      |                              | A1101-D1136 | (3)               |             |                   | NM 009929                             | acetone and enzymes             |
| perlecan                   | mAb      | A7L6       | MAB1948/Chemicon             |             |                   |             |                   |                                       | formaldehyde and enzymes        |
| agrin                      | pAb      |            |                              | E778-D958   | pET42a            |             |                   | BC059259                              | formaldehyde and enzymes        |
| nidogen-1                  | mAb      | ELM1       | RT797/NeoMarkers             |             |                   |             |                   |                                       | formaldehyde, acid, and enzymes |
| nidogen-2                  | pAb      |            |                              | T953-K1403  | pSecTag2A         | F275-T510   | pET42a            | AK140832                              | formaldehyde and enzymes        |
| netrin-1                   | pAb      | Ab-2       | PC364/Oncogene Science       |             |                   |             |                   |                                       | formaldehyde and enzymes        |
| netrin-4                   | pAb      |            |                              | M1-V628     | pSecTag2A         |             |                   | AF268066                              | formaldehyde and enzymes        |
| nephronectin               | pAb      |            |                              | M1-C561     | pFLAG-CMV-5a      |             |                   | AK050484                              | formaldehyde and enzymes        |
| papilin                    | pAb      |            |                              | M1-W309     | pSecTag2A         | R801-L1063  | pET42a            | AK086767                              | formaldehyde and enzymes        |
| Fras1                      | pAb      |            |                              | (4)         |                   | C27-C86     | pSecTag2A         | CAD33519.1                            | formaldehyde and enzymes        |
| QBRICK/Frem1               | pAb      |            |                              | (5)         |                   |             |                   |                                       | ethanol, acid, and enzymes      |
| endoglyx-1                 | pAb      |            |                              | T38-N56     | KLH               | G921-P939   | KLH               | AK077884                              | formaldehyde, acid, and enzymes |
| SMOC-1                     | pAb      |            |                              | M1-V463     | pClimyichis       |             |                   | AK040931                              | acetone, acid, and enzymes      |
| amelogenin                 | pAb      |            | PC-062/Kamiya Biomedical Co. |             |                   |             |                   |                                       | formaldehyde and enzymes        |
| ECM392/ependolin           | pAb      |            |                              | E175-M303   | pET42a            | K42-E160    | pET42a            | A830089108                            | no pretreatment                 |
| ECM661/MAEG                | pAb      |            |                              | (6)         |                   |             |                   | 6820436K20                            | formaldehyde and enzymes        |
| ECM742/cradin              | pAb      |            |                              | G153-M324   | pSecTag2A         | S30-D148    | pET42a            | A930041G11                            | no pretreatment                 |
| ECM306/WARP                | pAb      |            |                              | G207-P415   | pGEX4T1           | G33-Q217    | pGEX4T1           | 4932416A11                            | formaldehyde and enzymes        |
| ECM866/URB                 | pAb      |            |                              | K850-F863   | KLH               | S45-G59     | KLH               | 3321404F21                            | formaldehyde and enzymes        |
| ECM270/SMOC-2              | pAb      |            |                              | M1-G446     | pSecTag2A         | M1-T284     | pSecTag2A         | 5830469N15                            | formaldehyde, acid, and enzymes |
| ECM290/nectican            | pAb      |            |                              | N232-S346   | pGEX4T1           |             |                   | A030011G10                            | formaldehyde and enzymes        |
| ECM898/mamcan              | pAb      |            |                              | G24-E169    | pET42a            | A661-Y686   | KLH               | 9530067G07                            | ethanol and enzymes             |
| ECM885/vitrin              | pAb      |            |                              | A136-N261   | pET42a            | D467-R635   | pVEX              | F930032K14                            | formaldehyde and enzymes        |
| ECM314/empirin             | pAb      |            |                              | P70-E159    | pET42a            | G247-P349   | pET42a            | 9930102M17                            | ethanol and enzymes             |
| ECM482/leratin             | pAb      |            |                              | Q22-S107    | pET42a            | G110-S215   | pET42a            | D130017E17                            | ethanol and enzymes             |
| ECM322/ADAMTSL-4           | pAb      |            |                              | R95-D258    | pGEX4T1           |             |                   | B230114P05                            | formaldehyde and enzymes        |
| ECM517/RAINB2              | pAb      |            |                              | Q93-S232    | pGEX4T1           | D402-R576   | pGEX4T1           | A430070G12                            | formaldehyde and enzymes        |
| ECM432/tenonectin          | pAb      |            |                              | S158-G261   | pGEX4T1           |             |                   | A530057I08                            | ethanol and enzymes             |
| ECM311/IGFBP-rP10          | pAb      |            |                              | E176-Y313   | pGEX4T1           | Q32-G120    | pGEX4T1           | 5430425E24                            | formaldehyde, acid, and enzymes |
| ECM201/periolin            | pAb      |            |                              | K441-D512   | pGEX4T1           |             |                   | 5730451H22                            | acetone, acid, and enzymes      |
| ECM402/epidermacan         | pAb      |            |                              | G294-S380   | pGEX4T1           |             |                   | 4831422J22                            | formaldehyde                    |
| ECM343/photomedin-1        | pAb      |            |                              | (7)         |                   |             |                   | 9530014B09                            | formaldehyde                    |
| ECM501/photomedin-2        | pAb      |            |                              | (7)         |                   |             |                   | 4832415H08                            | formaldehyde                    |
| ECM331/coffeecrisp         | pAb      |            |                              | E417-Q495   | pGEX4T1           | P26-G208    | pGEX4T1           | 9330102O19                            | formaldehyde                    |
| ECM712/keratoadhesin       | pAb      |            |                              | N380-F393   | KLH               |             |                   | C130083I19                            | acetone and acid                |
| ECM678/MCP-11              | pAb      |            |                              | G236-S318   | pET42a            |             |                   | C130091P12                            | formaldehyde and enzymes        |

\*In most of the immunohistochemical analyses for newly identified ECM proteins, two nonoverlapping antigens (antigens 1 and 2) were used for the production of antibodies. Antibodies raised against antigen 1 were used for representation of the immunohistochemical data. The amino acid numbers refer to the polypeptides used as antigens. The expression vectors used for production of the antigens are also shown. KLH (keyhole limpet hemocyanin) indicates that synthetic peptides conjugated to KLH were used for the antibody production. Numbers in parentheses are references.

\*\*To optimize the staining with antibodies, the types of fixatives and conditions for pretreatments with acid (0.1 M KCl-HCl, pH 1.5) and/or enzymes (hyaluronidase and chondroitinase ABC) were determined for individual antibodies.

- Sado Y, et al. (1995) Establishment by the rat lymph node method of epitope-defined monoclonal antibodies recognizing the six different  $\alpha$  chains of human type IV collagen. *Histochem Cell Biol* 104:267-275.
- Seki T, et al. (1998) Differential expression of type IV collagen isoforms,  $\alpha$ 5(IV) and  $\alpha$ 6(IV) chains, in basement membranes surrounding smooth muscle cells. *Histochem Cell Biol* 110:359-366.
- Sasaki T, et al. (1998) Structure, function and tissue forms of the C-terminal globular domain of collagen XVIII containing the angiogenesis inhibitor endostatin. *EMBO J* 17:4249-56.
- Kiyozumi D, Sugimoto N, Sekiguchi K (2006) Breakdown of the reciprocal stabilization of QBRICK/Frem1, Fras1, and Frem2 at the basement membrane provokes Fraser syndrome-like defects. *Proc Natl Acad Sci USA* 103:11981-11986.
- Kiyozumi D, et al. (2005) Identification of a novel cell-adhesive protein spatiotemporally expressed in the basement membrane of mouse developing hair follicle. *Exp Cell Res* 306:9-23.
- Osada A, et al. (2005) Expression of MAEG, a novel basement membrane protein, in mouse hair follicle morphogenesis. *Exp Cell Res* 30:148-159.
- Furutani Y, et al. (2005) Identification and characterization of photomedins: novel olfactomedin-domain-containing proteins with chondroitin sulphate-E-binding activity. *Biochem J* 389:675-684.

## Other Supporting Information Files

[SI Appendix \(pdf\)](#)
